# Supplementary material for: Mechanical thrombectomy first versus direct angioplasty or stenting for the treatment of intracranial atherosclerotic stenosis-related large vessel occlusion: protocol for a systematic review and meta-analysis
Source: HighWire-hosted journal article supplement (doi:10.1136/bmjopen-2021-060136), 2022-10-01
Supplement: bmjopen-2021-060136supp001_data_supplement.pdf [file bmjopen-2021-060136supp001_data_supplement.pdf]

**PubMed from 2015 to June 01, 2022**

| #No. | Results    | Searches                                                                                                                                                                                                                                                                                              |
|------|------------|-------------------------------------------------------------------------------------------------------------------------------------------------------------------------------------------------------------------------------------------------------------------------------------------------------|
| 1    | 1,550,609  | Brain Ischemia OR Stroke OR Cerebral Ischemic Stroke OR Cerebral Infarction OR cerebrovascular disease OR cerebr* stroke OR cerebr* Ischemia OR cerebr* Infarct* OR "CIS"[tw] OR "CI"[tw] OR ("Ischemic Stroke"[Mesh])                                                                                |
| 2    | 7172       | ((("Cerebrovascular Disorders"[Mesh]) OR ("Intracranial Arteriosclerosis"[Mesh])) AND ("Atherosclerosis"[Mesh])) OR (intracranial atherosclerotic stenosis OR "ICAS"[tw] OR atherosclerotic intracranial arterial stenosis OR (intracranial artery stenosis AND intracranial artery atherosclerosis)) |
| 3    | 1,551,138  | 1 OR 2                                                                                                                                                                                                                                                                                                |
| 4    | 134,368    | (Stent* OR stent* retrieval thrombectomy OR stent* retriever OR direct* stent* OR stent* implantation OR "PTAS"[tw]) OR ("Stents"[Mesh])                                                                                                                                                              |
| 5    | 89,095     | (direct* angioplasty OR percutaneous transluminal angioplasty OR "PTA"[tw]) OR ("Angioplasty"[Mesh])                                                                                                                                                                                                  |
| 6    | 190,105    | 4 OR 5                                                                                                                                                                                                                                                                                                |
| 7    | 49,719     | mechanical thrombectomy OR Mechanical* thrombectom* OR "MT"[TW] OR Mechanical Thrombolysis                                                                                                                                                                                                            |
| 8    | 1522       | 3 AND 6 AND 7                                                                                                                                                                                                                                                                                         |
| 9    | 5,035,618  | animals [mh] NOT humans [mh]                                                                                                                                                                                                                                                                          |
| 10   | 1498       | 8 NOT 9                                                                                                                                                                                                                                                                                               |
| 11   | 9,411,185  | ((Chinese[Language]) OR (English[Language])) AND ("2015/01/01"[Date - Publication] : "2022/06/01"[Date - Publication])                                                                                                                                                                                |
| 12   | 10,995,396 | “Clinical Trial” [pt] OR “Clinical Trials as Topic” [Mesh] OR “Random Allocation” [Mesh] OR “Case-Control Studies” [Mesh] OR “Cohort Studies” [Mesh] OR “Comparative study” [pt] OR “Comparative Effectiveness Research” [Mesh] OR random*[tw] OR                                                     |

placebo[tw] OR groups[tw] OR trail[tw] OR cohort\*[tw] OR follow up\*[tw] OR case control\*[tw] OR compar\*[tw] OR “comparative study” [filter] OR “clinical trial” [filter] OR “multicenter study” [filter]

13 761 10 AND 11 AND 12

### Cochrane Central Register of Controlled Trials (CENTRAL) from 2015 to 2022

| #No. | Results | Searches                                                       |
|------|---------|----------------------------------------------------------------|
| 1    | 78875   | MeSH descriptor: [Ischemic Stroke] explode all trees           |
| 2    | 17426   | MeSH descriptor: [Cerebrovascular Disorders] explode all trees |
| 3    | 122     | (intracranial atherosclerotic stenosis):ti,ab,kw               |
| 4    | 103     | (ICAS):ti,ab,kw                                                |
| 5    | 36      | (atherosclerotic intracranial arterial stenosis):ti,ab,kw      |
| 6    | 337     | (intracranial artery stenosis):ti,ab,kw                        |
| 7    | 131     | (intracranial artery atherosclerosis):ti,ab,kw                 |
| 8    | 228     | #3 or #4 or #5 or (#6 and #7)                                  |
| 9    | 17567   | #8 or #2 or #1                                                 |
| 10   | 4567    | MeSH descriptor: [Stents] explode all trees                    |
| 11   | 17062   | (Stent*):ti,ab,kw                                              |
| 12   | 21      | (stent* retrieval thrombectomy):ti,ab,kw                       |
| 13   | 233     | (stent* retriever):ti,ab,kw                                    |
| 14   | 1017    | (direct* stent*):ti,ab,kw                                      |
| 15   | 3650    | (stent* implantation):ti,ab,kw                                 |
| 16   | 60      | (PTAS):ti,ab,kw                                                |
| 17   | 17096   | #10 or #11 or #12 or #13 or #14 or #15 or #16                  |
| 18   | 4538    | MeSH descriptor: [Angioplasty] explode all trees               |
| 19   | 661     | (direct* angioplasty):ti,ab,kw                                 |
| 20   | 2565    | (percutaneous transluminal angioplasty):ti,ab,kw               |
| 21   | 1253    | (PTA):ti,ab,kw                                                 |
| 22   | 21309   | #17 or #18 or #19 or #20 or #21                                |

|    |      |                                                        |
|----|------|--------------------------------------------------------|
| 23 | 671  | (mechanical thrombectomy):ti,ab,kw                     |
| 24 | 676  | (Mechanical* thrombectom*):ti,ab,kw                    |
| 25 | 3130 | (MT):ti,ab,kw                                          |
| 26 | 459  | (Mechanical Thrombolysis):ti,ab,kw                     |
| 27 | 3798 | #23 or #24 or #25 or #26                               |
| 28 | 68   | #9 and #22 and #27                                     |
| 29 | 56   | #28 with Publication Year from 2015 to 2022, in Trials |

#### Web of Science from 2015 to June 01, 2022

| #No. | Results | Searches                                                                                                                                                                                                                                                         |
|------|---------|------------------------------------------------------------------------------------------------------------------------------------------------------------------------------------------------------------------------------------------------------------------|
| 1    | 692,739 | TS=(acute ischemic stroke OR Brain Ischemia OR Stroke OR Cerebral Ischemic Stroke OR Cerebral Infarction OR cerebrovascular disease OR cerebr* stroke OR cerebr* Ischemia OR cerebr* Infarct* ) OR AB=(CIS OR CI)                                                |
| 2    | 4,567   | TS=(Cerebrovascular Disorders OR intracranial atherosclerotic stenosis OR atherosclerotic intracranial arterial stenosis) OR TS=(intracranial artery stenosis AND intracranial artery atherosclerosis) OR TS=(Intracranial Arteriosclerosis AND Atherosclerosis) |
| 3    | 693,292 | #2 OR #1                                                                                                                                                                                                                                                         |
| 4    | 14,393  | TS=(Stent*OR stent* retrieval thrombectomy OR stent* retriever OR direct* stent* OR stent* implantation) OR AB=PTAS                                                                                                                                              |
| 5    | 17,922  | TS=(Angioplasty OR direct* angioplasty OR percutaneous transluminal angioplasty) OR AB=PTA                                                                                                                                                                       |
| 6    | 29,815  | #5 OR #4                                                                                                                                                                                                                                                         |
| 7    | 33,841  | TS=(mechanical thrombectomy OR Mechanical* thrombectom* OR Mechanical Thrombolysis) OR AB= MT                                                                                                                                                                    |
| 8    | 1,149   | #7 AND #6 AND #3                                                                                                                                                                                                                                                 |

#### Embase from 2015 to June 01, 2022

| #No. | Results | Searches                                                                                                                                                                                                    |
|------|---------|-------------------------------------------------------------------------------------------------------------------------------------------------------------------------------------------------------------|
| 1    | 5,407   | 'acute ischemic stroke'/exp                                                                                                                                                                                 |
| 2    | 852,109 | 'cerebrovascular disease'/exp                                                                                                                                                                               |
| 3    | 7,092   | 'atherosclerosis'/exp AND 'brain atherosclerosis'/exp                                                                                                                                                       |
| 4    | 179,049 | (((((brain AND ischemia OR stroke OR cerebral) AND ischemic AND stroke OR cerebral) AND infarction OR cerebrovascular) AND disease OR cerebr*) AND stroke OR cerebr*) AND ischemia OR cerebr*) AND infarct* |
| 5    | 1,891   | ((intracranial AND atherosclerotic AND stenosis OR atherosclerotic) AND intracranial AND arterial AND stenosis OR intracranial) AND stenosis AND intracranial AND artery AND atherosclerosis                |
| 6    | 866,656 | #1 OR #2 OR #3 OR #4 OR #5                                                                                                                                                                                  |
| 7    | 203,012 | 'stent'/exp                                                                                                                                                                                                 |
| 8    | 99,033  | 'angioplasty'/exp                                                                                                                                                                                           |
| 9    | 38,923  | ((stent* AND retrieval AND thrombectomy OR stent*) AND retriever OR direct*) AND stent* OR stent*) AND implantation OR 'ptas'                                                                               |
| 10   | 65,156  | (direct* AND angioplasty OR percutaneous) AND transluminal AND angioplasty OR 'pta'                                                                                                                         |
| 11   | 285,580 | #7 OR #8 OR #9 OR #10                                                                                                                                                                                       |
| 12   | 7,274   | ((mechanical AND thrombectomy OR mechanical*) AND thrombectom* OR 'mt' OR mechanical) AND thrombolysis                                                                                                      |
| 13   | 1,408   | #6 AND #11 AND #12                                                                                                                                                                                          |
| 14   | 859     | #13 AND ([chinese]/lim OR [english]/lim) AND [2015-2022]/py                                                                                                                                                 |
